# Supplementary material
Source: publisher figshare collection journal article supplement (https://diabetesjournals.figshare.com/ndownloader/files/28864101)

## Online-only Supplemental Material

### What do I want to work on now to help prevent diabetes?

Please choose **ONE** item to focus on before next class

#### Getting Active

1. I will \_\_\_\_\_ to **get my heart rate up** \_\_\_\_\_ days per  
(Ex: walk, bike, hike, swim, garden) (Number)

week for \_\_\_\_\_ minutes.  
(Number)

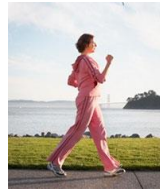

2. I will \_\_\_\_\_ to **build my muscles** \_\_\_\_\_ days per  
(Ex: lift weights, use resistance bands, push-ups) (Number)

week for \_\_\_\_\_ minutes.  
(Number)

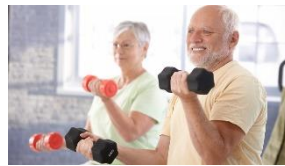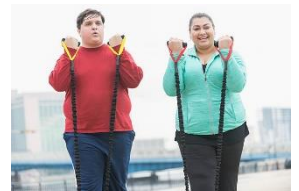

#### Eating Better

1. I will eat \_\_\_\_\_ **fruits and/or vegetables** each day.  
(Number)

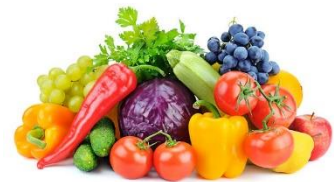

2. I will **limit my sweets** to \_\_\_\_\_ per day.  
(Number)

3. I will eat \_\_\_\_\_ **meals** per day.  
(Number)

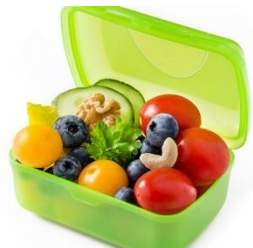

4. I will **limit fast food and junk food** to \_\_\_\_\_ times per day.  
(Number)

5. I will **eat with a smaller plate or bowl** \_\_\_\_\_ times per day.  
(Number)

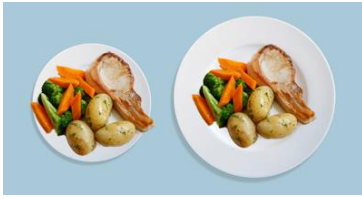

6. I will **stop eating when I am full** \_\_\_\_\_ times per day.  
(Number)

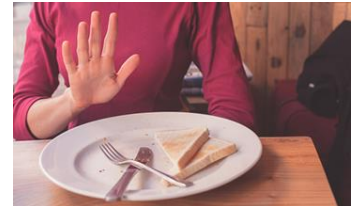

### Choosing Healthier Beverages

1. I will drink \_\_\_\_\_ cups of **water** each day.  
(Number)

2. I will **limit my soda and sugary drinks** to \_\_\_\_\_ per day.  
(Number)

3. I will **limit alcoholic beverages** to \_\_\_\_\_ per week.  
(Number)

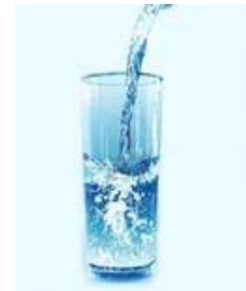

### Dealing with Stress

1. I will \_\_\_\_\_ to **reduce stress** for \_\_\_\_\_ minutes \_\_\_\_\_ days  
(Ex: meditate, deep breathe, walk) (Number) (Number)

per week.

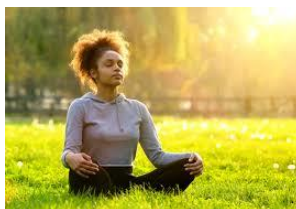

Supplement: Supplementary file 1 [file 28864101]
